# Supplementary material for: High-performance, biaxially stretchable conductor based on Ag composites and hierarchical auxetic structure
Source: Royal Society of Chemistry journal article supplement (doi:10.1039/c9tc06036g), 2019-12-06
Supplement: c9tc06036g1.pdf [file c9tc06036g1.pdf]

## Supporting Information

# High-Performance, Biaxially Stretchable Conductor Based on Ag Composites and Hierarchical Auxetic Structure

Seolhee Han,<sup>a,b</sup> Sungmook Jung,<sup>a</sup> Sunho Jeong,<sup>c</sup> Jihoon Choi,<sup>b</sup> Youngmin Choi,<sup>\*a</sup> and Su Yeon Lee<sup>\*a</sup>

<sup>a</sup> Division of Advanced Materials  
Korea Research Institute of Chemical Technology (KRICT)  
141 Gajeongro, Daejeon 34114, Republic of Korea

<sup>b</sup> Department of Materials Science and Engineering, Chungnam National University  
99 Daehak-ro, Yuseong-gu, Daejeon 34134, Republic of Korea

<sup>c</sup> Department of Advanced Materials Engineering for Information and Electronics,  
Kyung Hee University, Yongin-si, Gyeonggi-do 17104, Republic of Korea

## **Experimental Section**

### **Preparation of Hierarchically Structured PDMS Mold**

For the hierarchical structures, the fractal cut patterns were printed using a stereolithographic 3D printer (Form 2, Form-labs). This pattern was transferred to the PDMS mold by replica molding. To easily release the Ag conductor, the PDMS mold was surface-treated by vapor-phase deposition using (tridecafluoro-1,1,2,2-tetrahydrooctyl)trichlorosilane (SIT8174.0, Gelest) in a vacuum desiccator after oxygen plasma treatment.

### **Fabrication of Biaxially Stretchable Conductor**

To prepare Ag pastes, Ag flakes (DSF-500MWZ-S, Daejoo Electronic Materials Co.) were mixed with MIBK (Sigma-Aldrich) and PDMS (Sylgard 184, Dow Corning Corp.) in 3–9:2:1 weight ratio, followed by vortexing and sonication. Then, the Ag pastes with different volume fractions (22–45 vol%) were dropped onto the surface-treated PDMS mold, followed by blading it across the PDMS mold. After solvent evaporation and curing, a PDMS supporting layer was formed on the Ag pastes by the same process. The bi-layered conductor comprising Ag pastes and the PDMS supporting layer was released from the mold after curing for 3 h in an oven at 80 °C.

### **Characterization of stretchable conductors**

The electrical resistance and stretchability of the stretchable conductors were measured using a digital multimeter (DMM7510, Keithley) and biaxial stretching machine (Namil Optical Instruments), respectively. The Young's modulus of the Ag conductor was measured using a motorized test stand (ESM 303, Mark-10, USA) and a force gauge (M7-2, Mark-10, USA). The I-V curves were measured using a source meter (2450 SourceMeter, Keithley) under various strains (0–50%) in the external voltage range of 0 to +5 V.



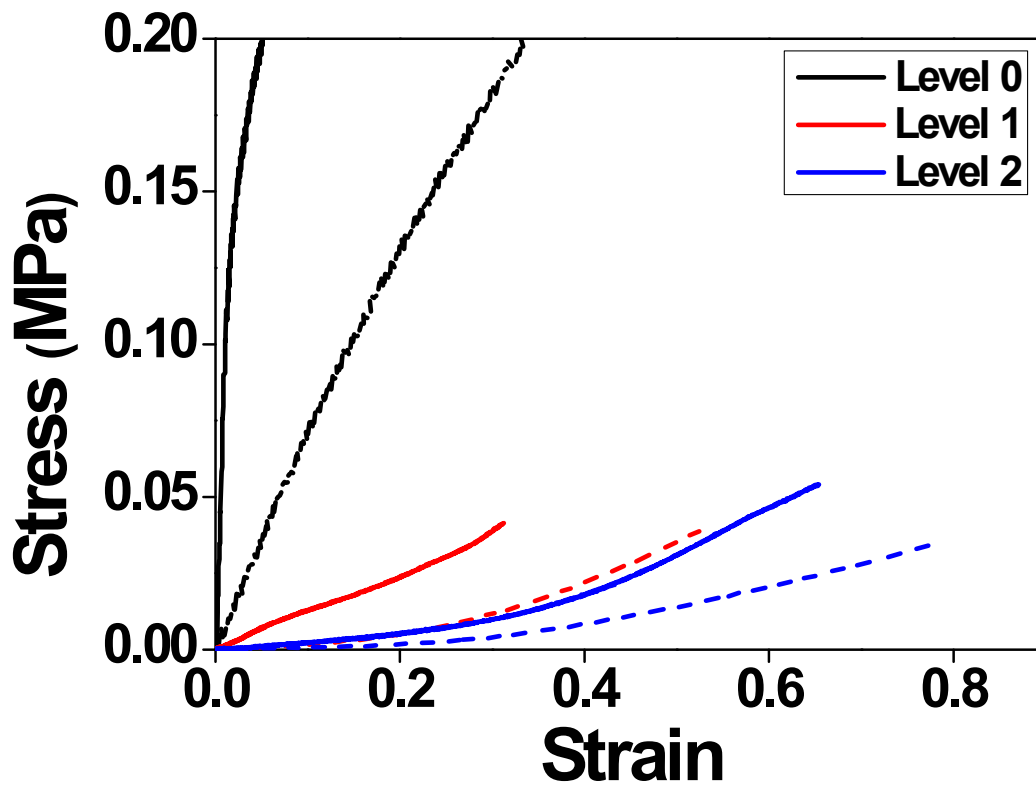

**Fig. S1** Stress-strain curves of the hierarchically cut-based conductor at different levels (solid lines: Ag conductors, dash lines: non-conductive films)

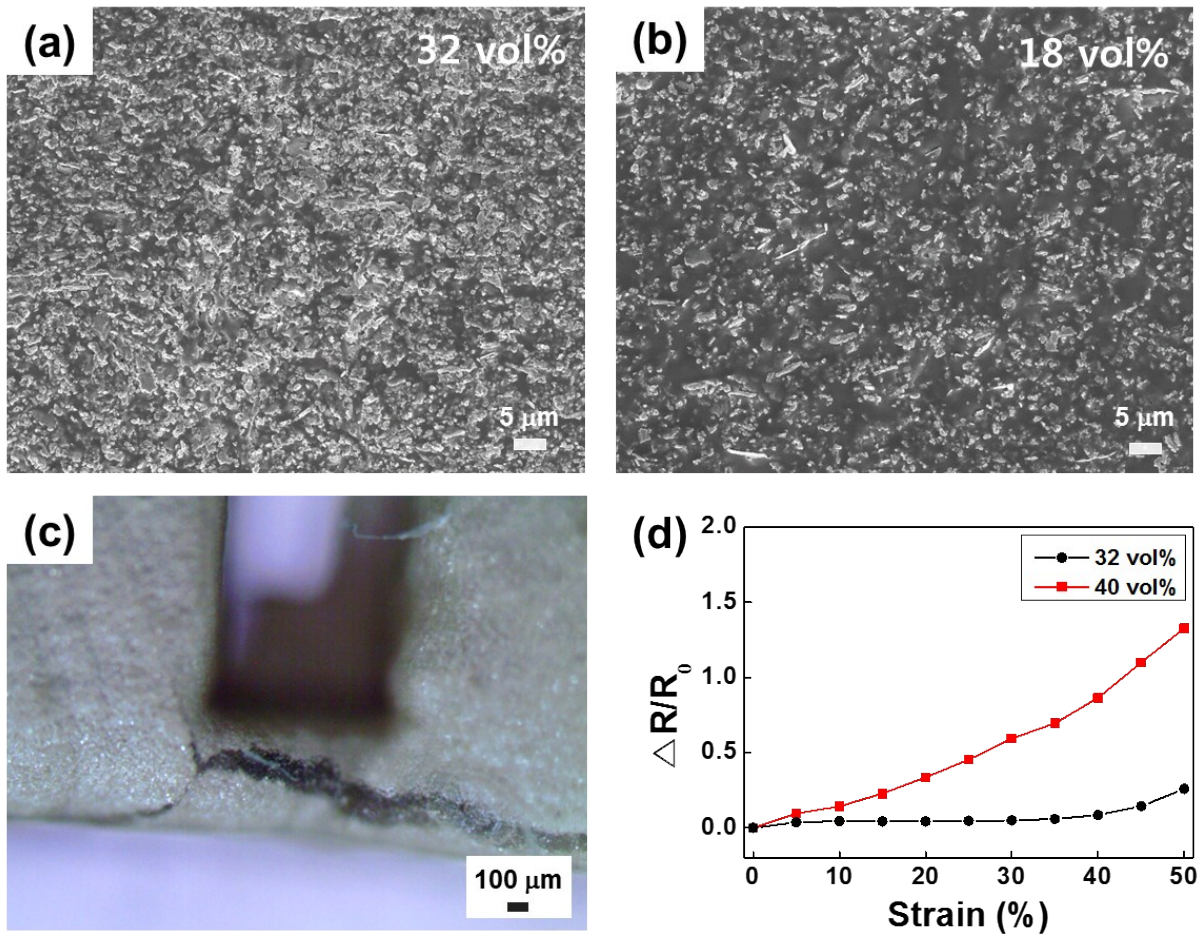

**Fig. S2** The cross-sectional SEM image of stretchable conductors with (a) 32 vol% and (b) 18 vol%. (c) Optical microscopy (OM) image of conductor with high volume fraction of Ag flakes. (d) The normalized resistance variation ( $\Delta R/R_0$ ) of stretchable conductor composed of 32, 40 vol% Ag as a function of tensile strain.

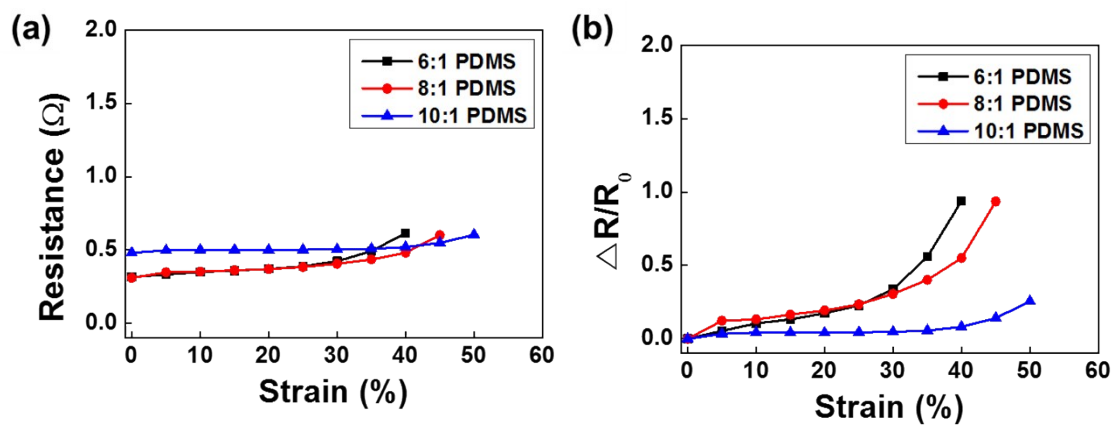

**Fig. S3** (a) The resistance variation and (b) the normalized resistance variation of stretchable conductor as a function of Young's modulus.

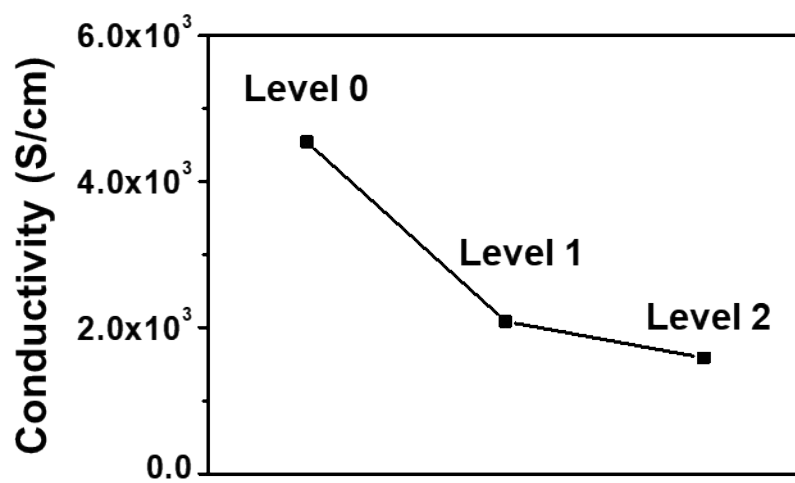

**Fig. S4** The conductivity evolution of Ag composites as a function of hierarchy level.

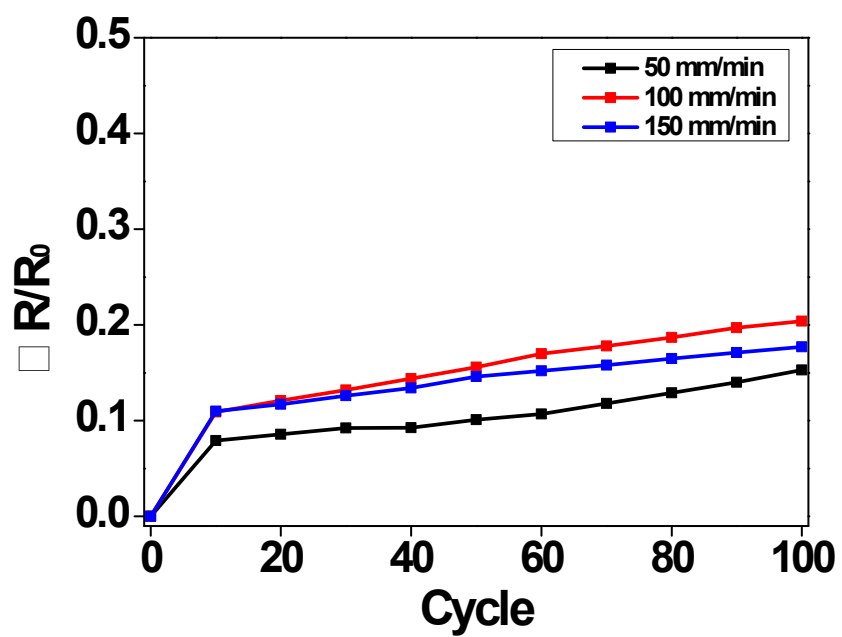

**Fig. S5** The normalized resistance change during a long-term cycling test at various stretching speeds.
